# Supplementary material for: Theoretical study on molecular design and optical properties of organic sensitizers
Source: Royal Society of Chemistry journal article supplement (doi:10.1039/c4cp01653j), 2014-01-01
Supplement: c4cp01653j1.pdf [file c4cp01653j1.pdf]

## Supplementary Materials

### **Theoretical study on molecular design and optical properties of organic sensitizers**

Nachimuthu Santhanamoorthi, Kuan-Hwa Lai, Fadlilatul Taufany and Jyh-Chiang Jiang\*

Department of Chemical Engineering, National Taiwan University of Science and Technology,  
Taipei-106, Taiwan.

\* Corresponding author

E-mail: [jcjiang@mail.ntust.edu.tw](mailto:jcjiang@mail.ntust.edu.tw), Telephone: +886-2-27376653. Fax: +886-2-27376644.

**Table 1S.** The calculated maximum absorption wavelength (in nm ) for P1B, P2B and TC1 dyes using different DFT functionals at 6-31G\* level.

| <b>Dyes</b> | <b>Medium</b> | <b>B3LYP</b> | <b>CAM-B3LYP</b> | <b>BH and HLYP</b> | <b>M062X</b> | <b>M06HF</b> | <b>wB97XD</b> | <b>ZINDO</b> | <b>Exp<sup>a</sup></b> |
|-------------|---------------|--------------|------------------|--------------------|--------------|--------------|---------------|--------------|------------------------|
| <b>P1B</b>  | Gas           | 431          | 354              | 352                | 358          | 319          | 346           | 373          | -                      |
|             | THF           | 454          | 366              | 366                | 371          | 327          | 357           | 388          | 385                    |
|             | Methanol      | 454          | 365              | 364                | 370          |              | 356           | 386          | -                      |
| <b>P2B</b>  | Gas           | 337          | 297              | 290                | 299          | 278          | 294           | 335          | -                      |
|             | THF           | 352          | 307              | 299                | 310          | 286          | 303           | 346          | 329                    |
|             | Methanol      | 353          | 307              | 299                | 310          | 286          | 304           | 346          | -                      |
| <b>TC1</b>  | Gas           | 418          | 359              | 353                | 363          | 331          | 354           | 388          | -                      |
|             | THF           | 451          | 382              | 374                | 387          | 349          | 375           | 416          | -                      |
|             | Methanol      | 451          | 382              | 374                | 387          | 349          | 375           | 415          | 400                    |

<sup>a</sup>. Taken from Ref. [41] and [42]

**Table 2S.** The calculated maximum absorption wavelength (in nm ) for D- $[\pi]_n$ -A<sub>1</sub> series of sensitizers using ZINDO and M06-2X/6-31G\* methods.

| <b>Sensitizer</b>            | <b>State</b>                    | <b>ZINDO</b> | <b>M06-2X</b> |
|------------------------------|---------------------------------|--------------|---------------|
| D- $[\pi]_1$ -A <sub>1</sub> | S <sub>0</sub> → S <sub>1</sub> | 364          | 328           |
| D- $[\pi]_2$ -A <sub>1</sub> | S <sub>0</sub> → S <sub>1</sub> | 368          | 333           |
| D- $[\pi]_3$ -A <sub>1</sub> | S <sub>0</sub> → S <sub>1</sub> | 371          | 337           |
| D- $[\pi]_4$ -A <sub>1</sub> | S <sub>0</sub> → S <sub>1</sub> | 372          | 339           |

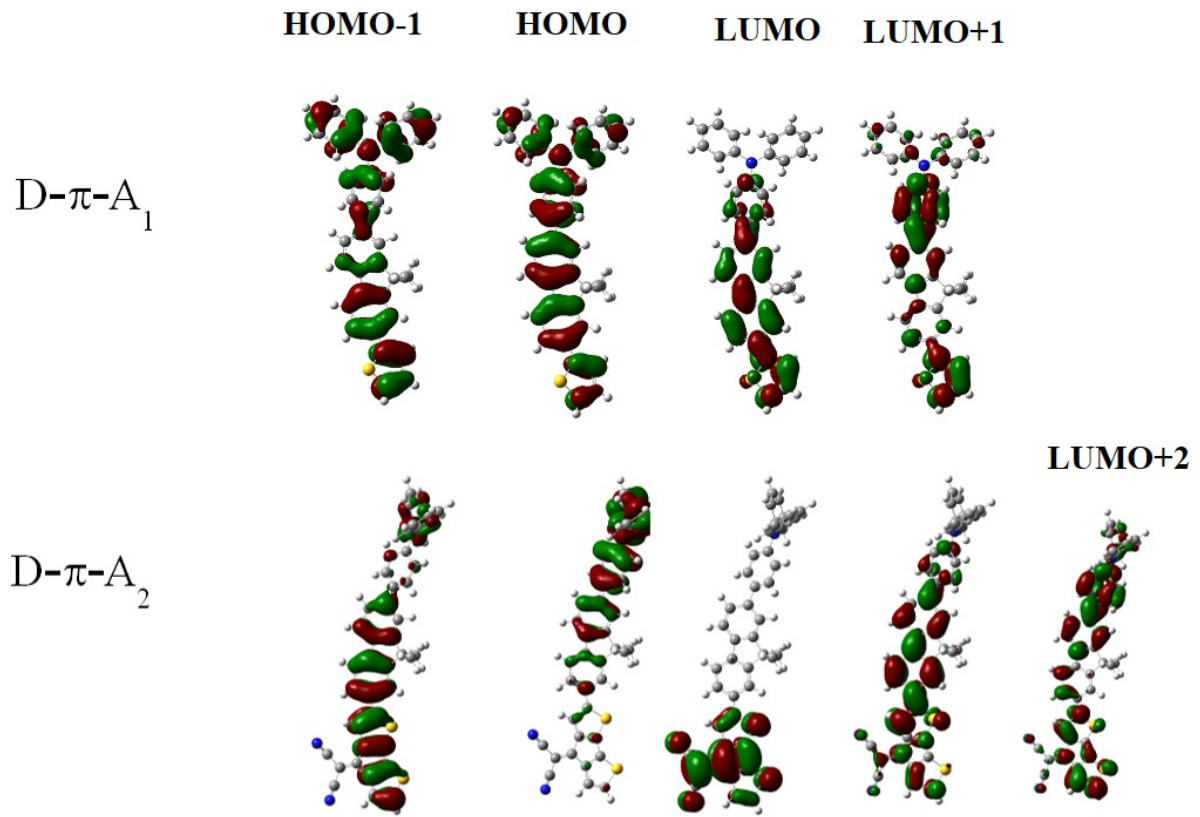

**Figure 1S.** Selected isodensity plots of the frontier MOs for D- $\pi$ -A<sub>1</sub> and D- $\pi$ -A<sub>2</sub> sensitizers

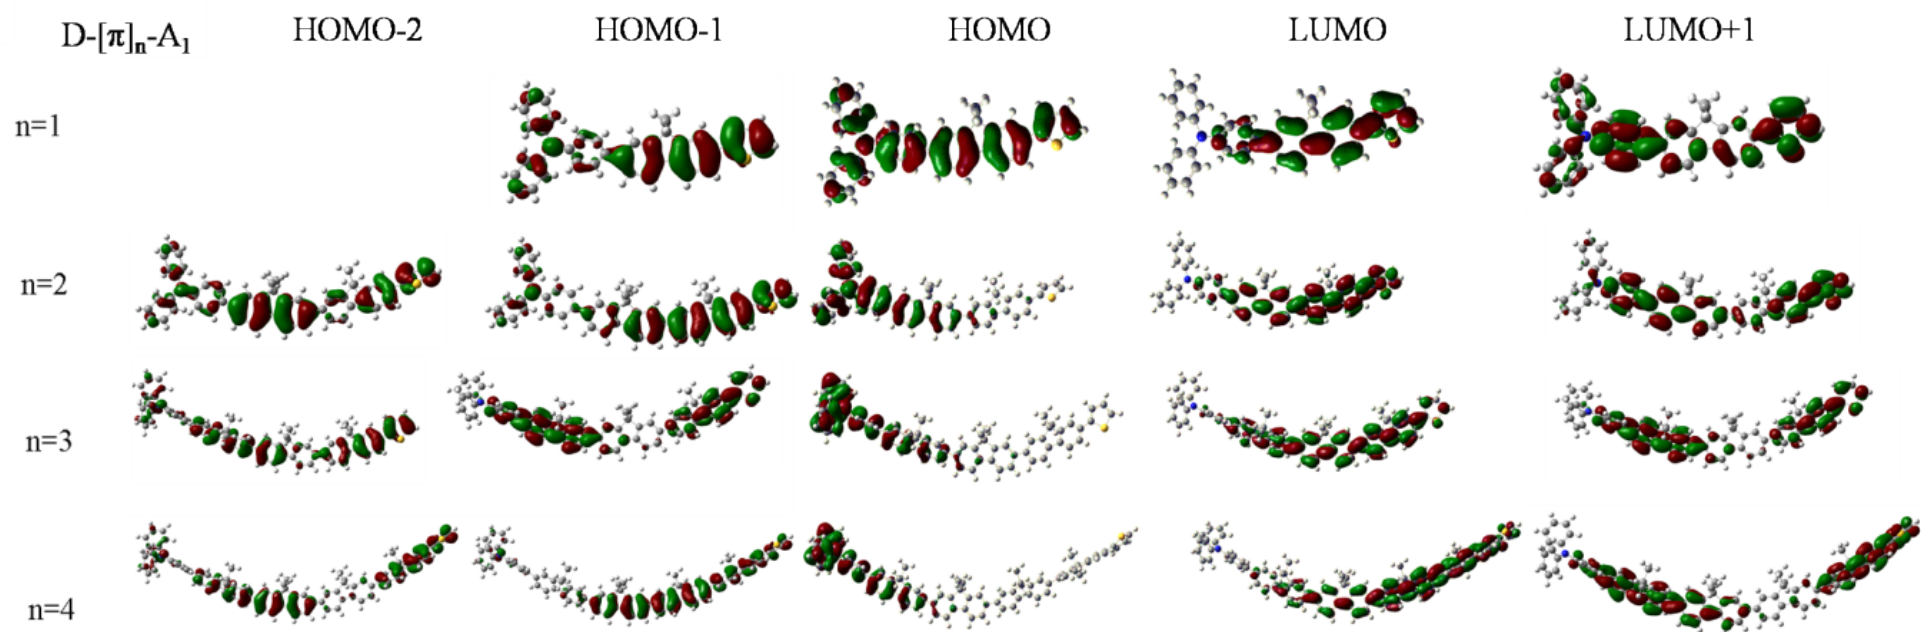

**Figure 2S.** Selected isodensity plots of the frontier MOs for D- $[\pi]_n$ -A<sub>1</sub> series sensitizers.

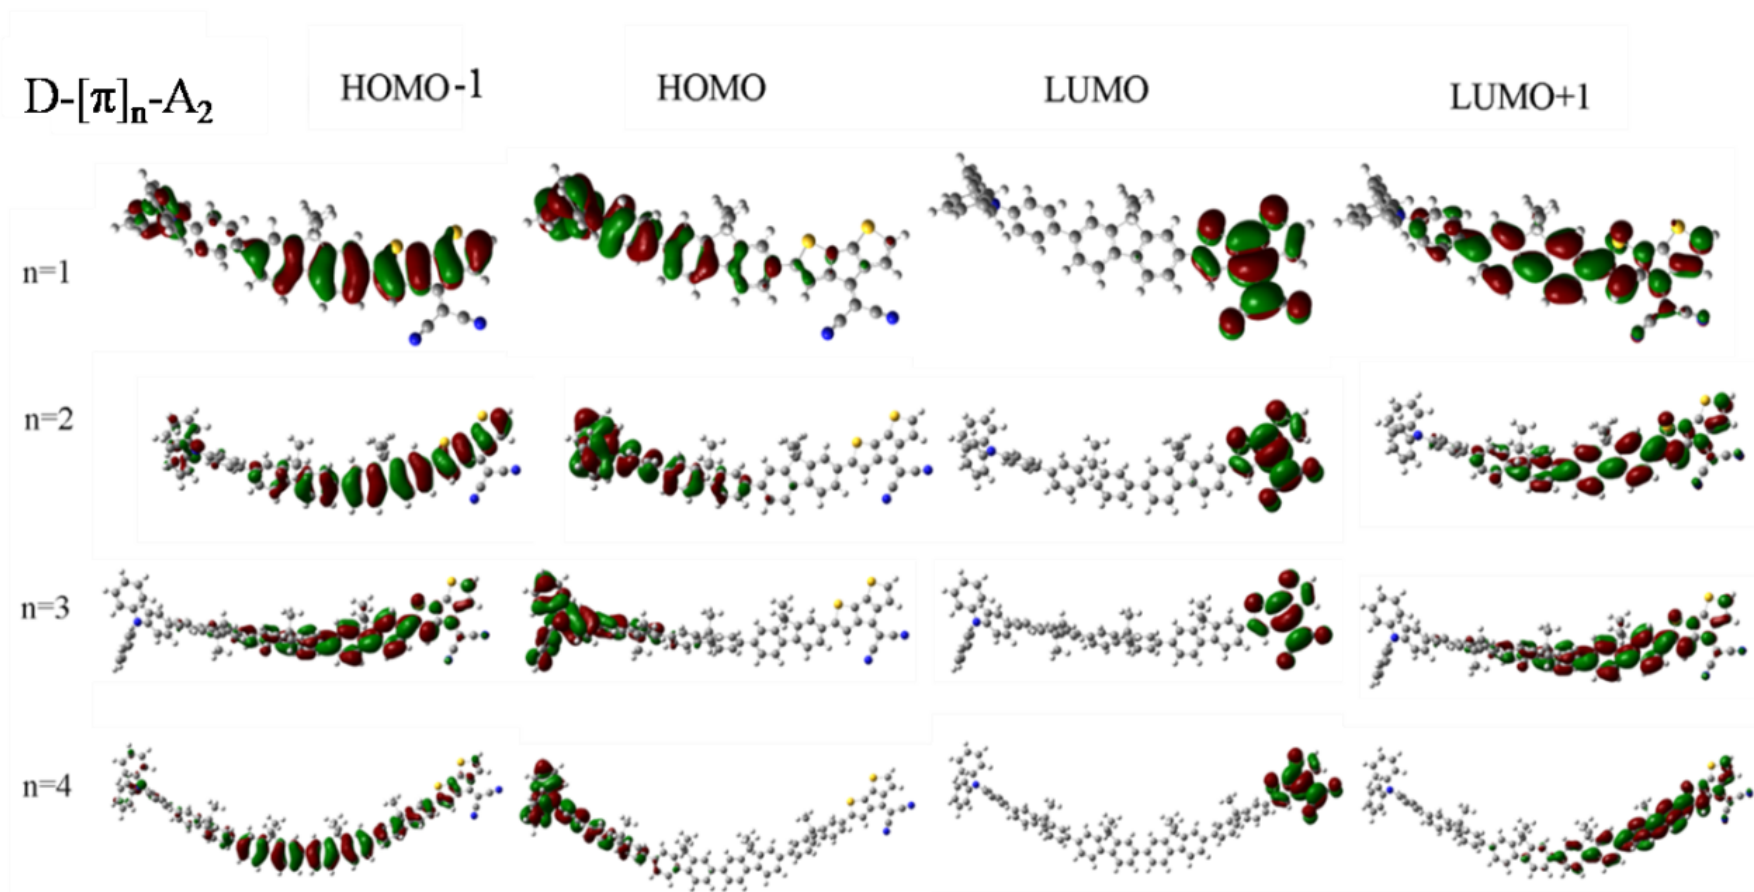

**Figure 3S.** Selected isodensity plots of the frontier MOs for  $D-[\pi]_n-A_2$  series sensitizers.

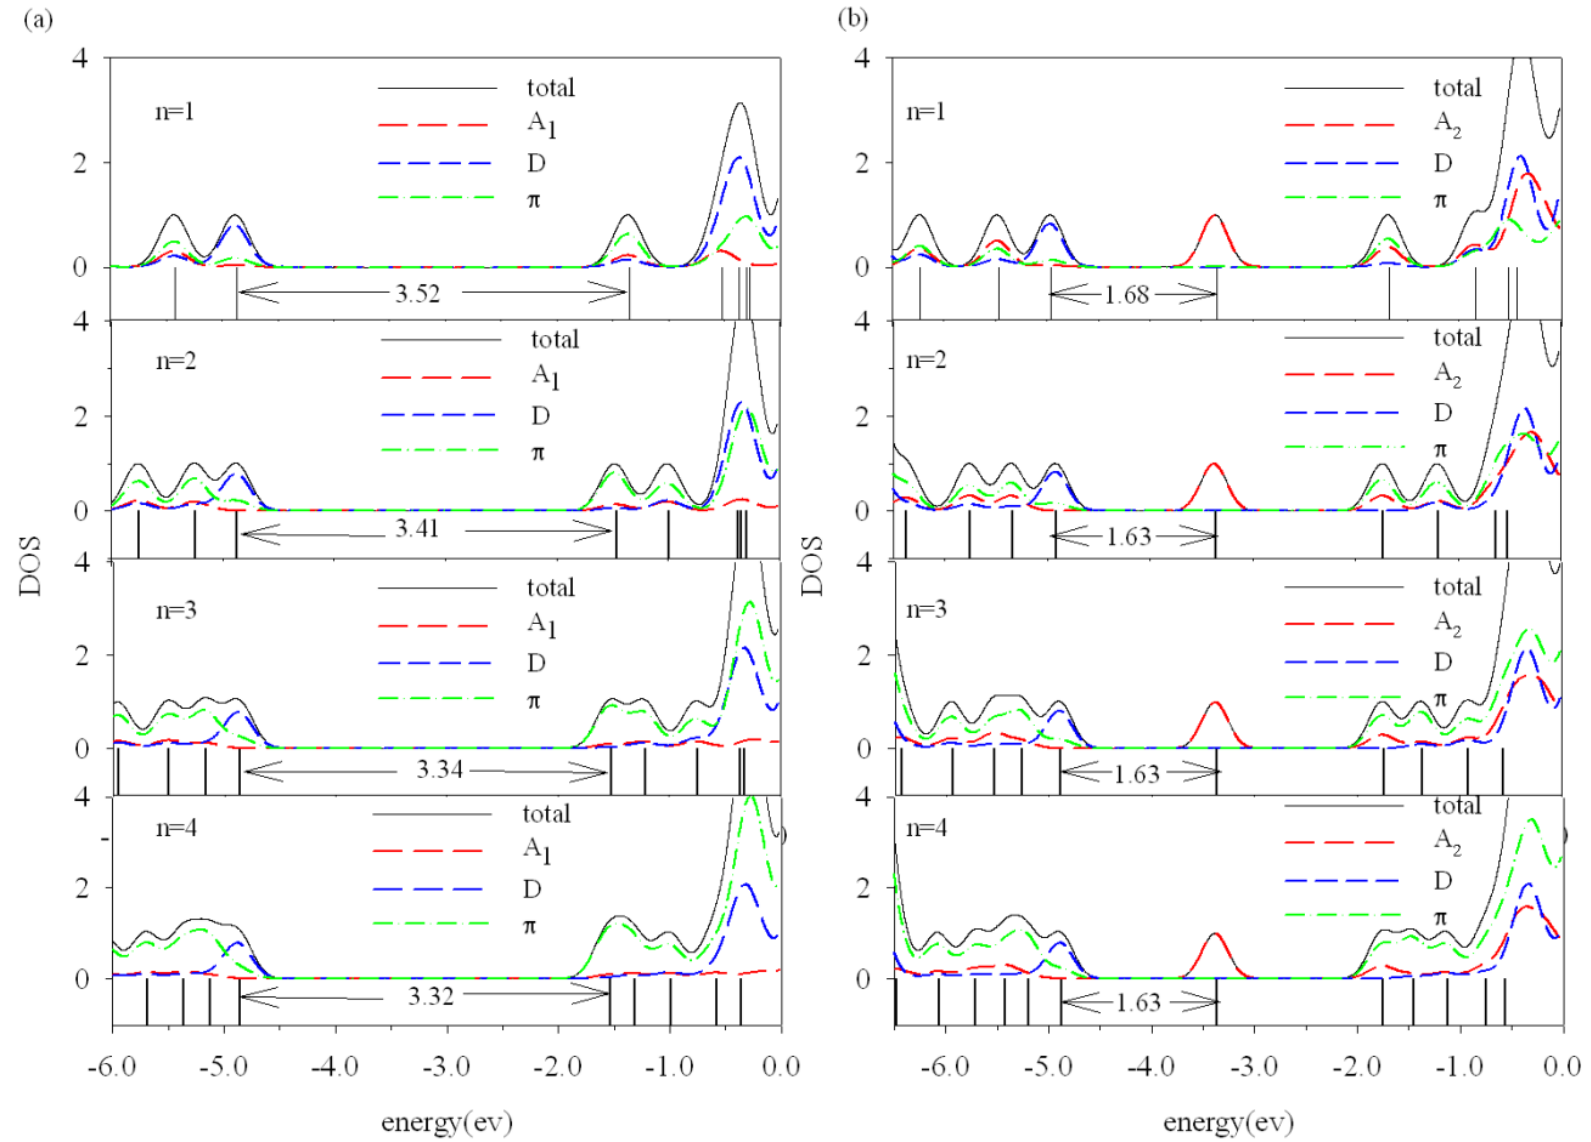

**Figure 4S.** The total density of states of (a) D-[ $\pi$ ]<sub>n</sub>-A<sub>1</sub> (b) D-[ $\pi$ ]<sub>n</sub>-A<sub>2</sub> sensitizers

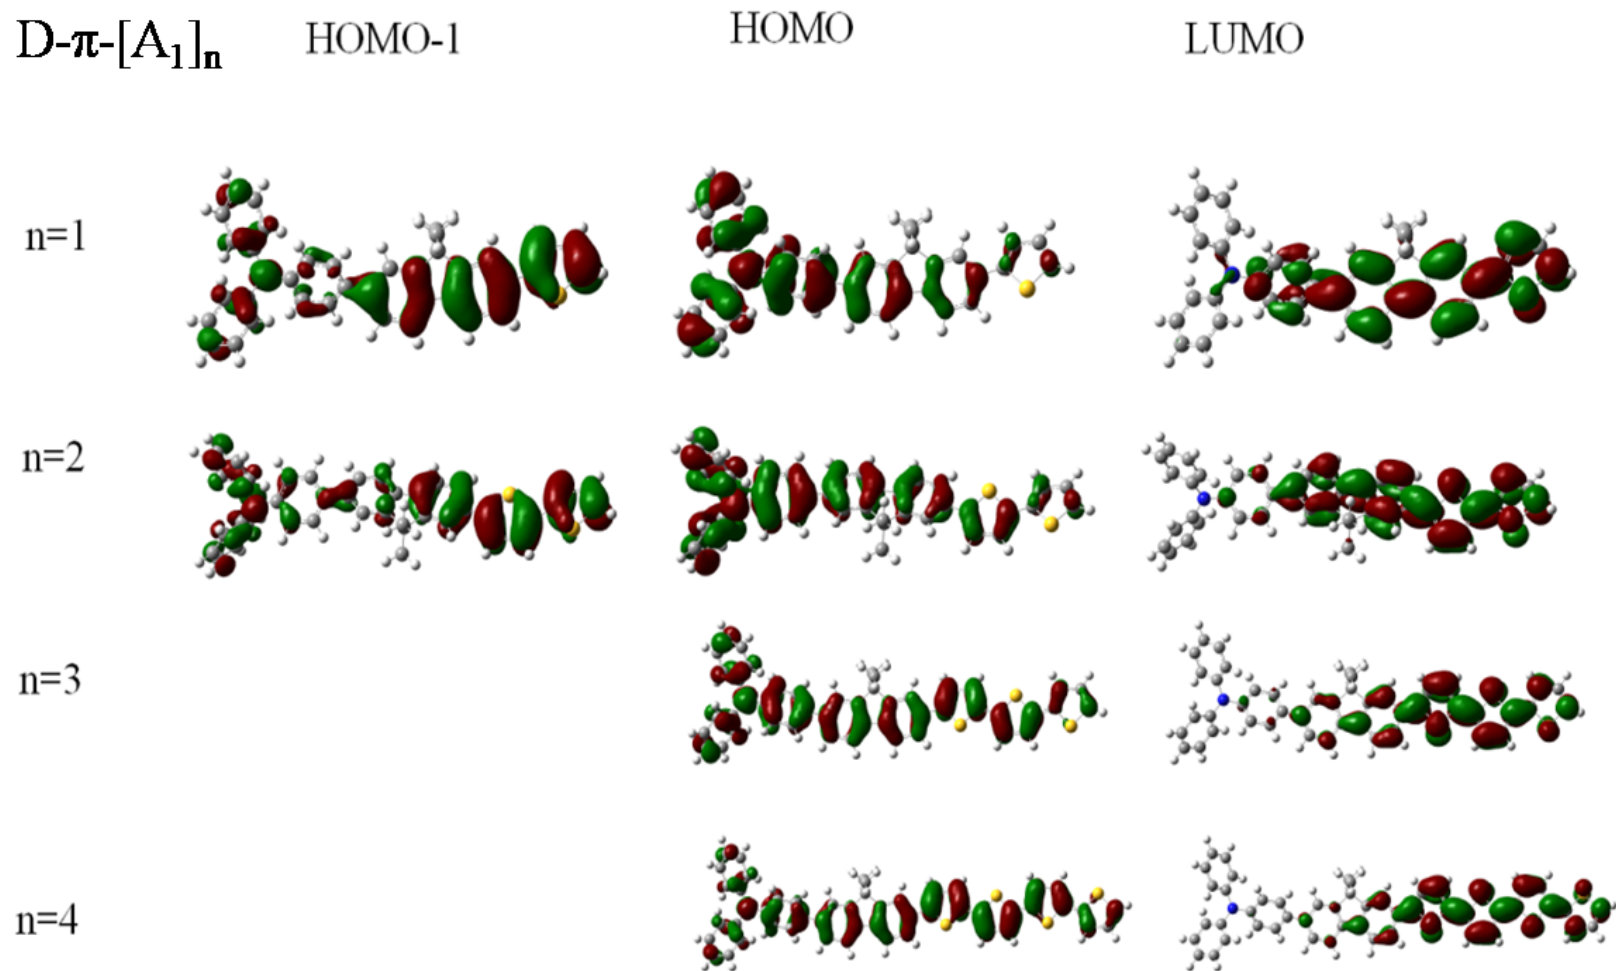

**Figure 5S.** Selected isodensity plots of the frontier MOs for  $D-\pi-[A_1]_n$  series sensitizers



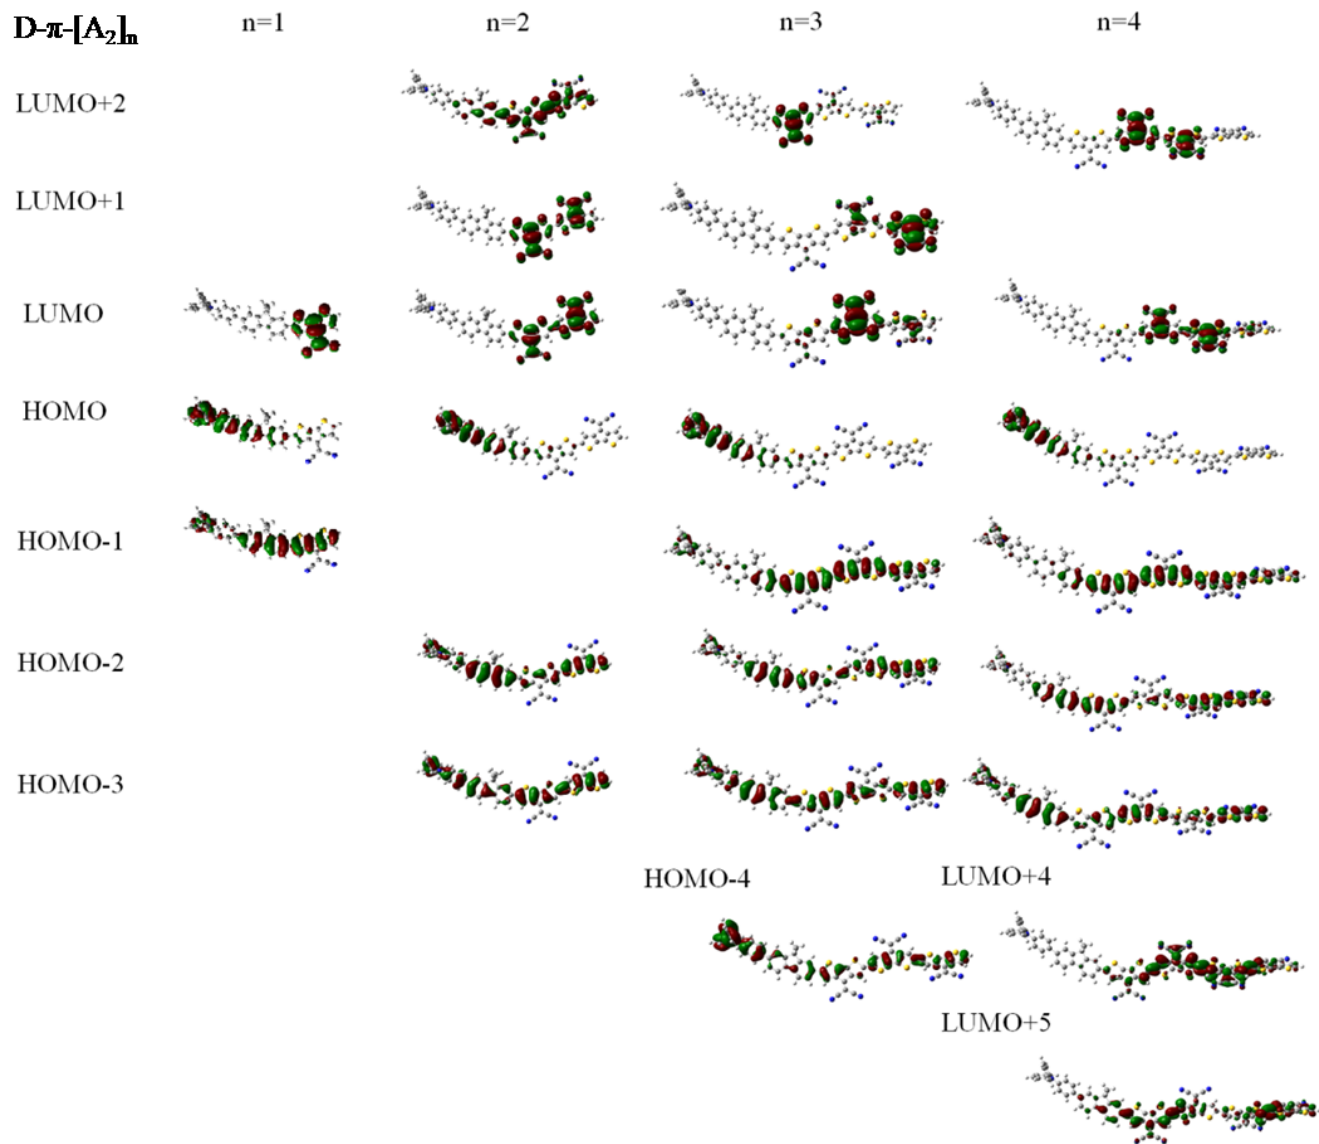

**Figure 6S.** Selected isodensity plots of the frontier MOs for  $D-\pi-[A_2]_n$  series sensitizers

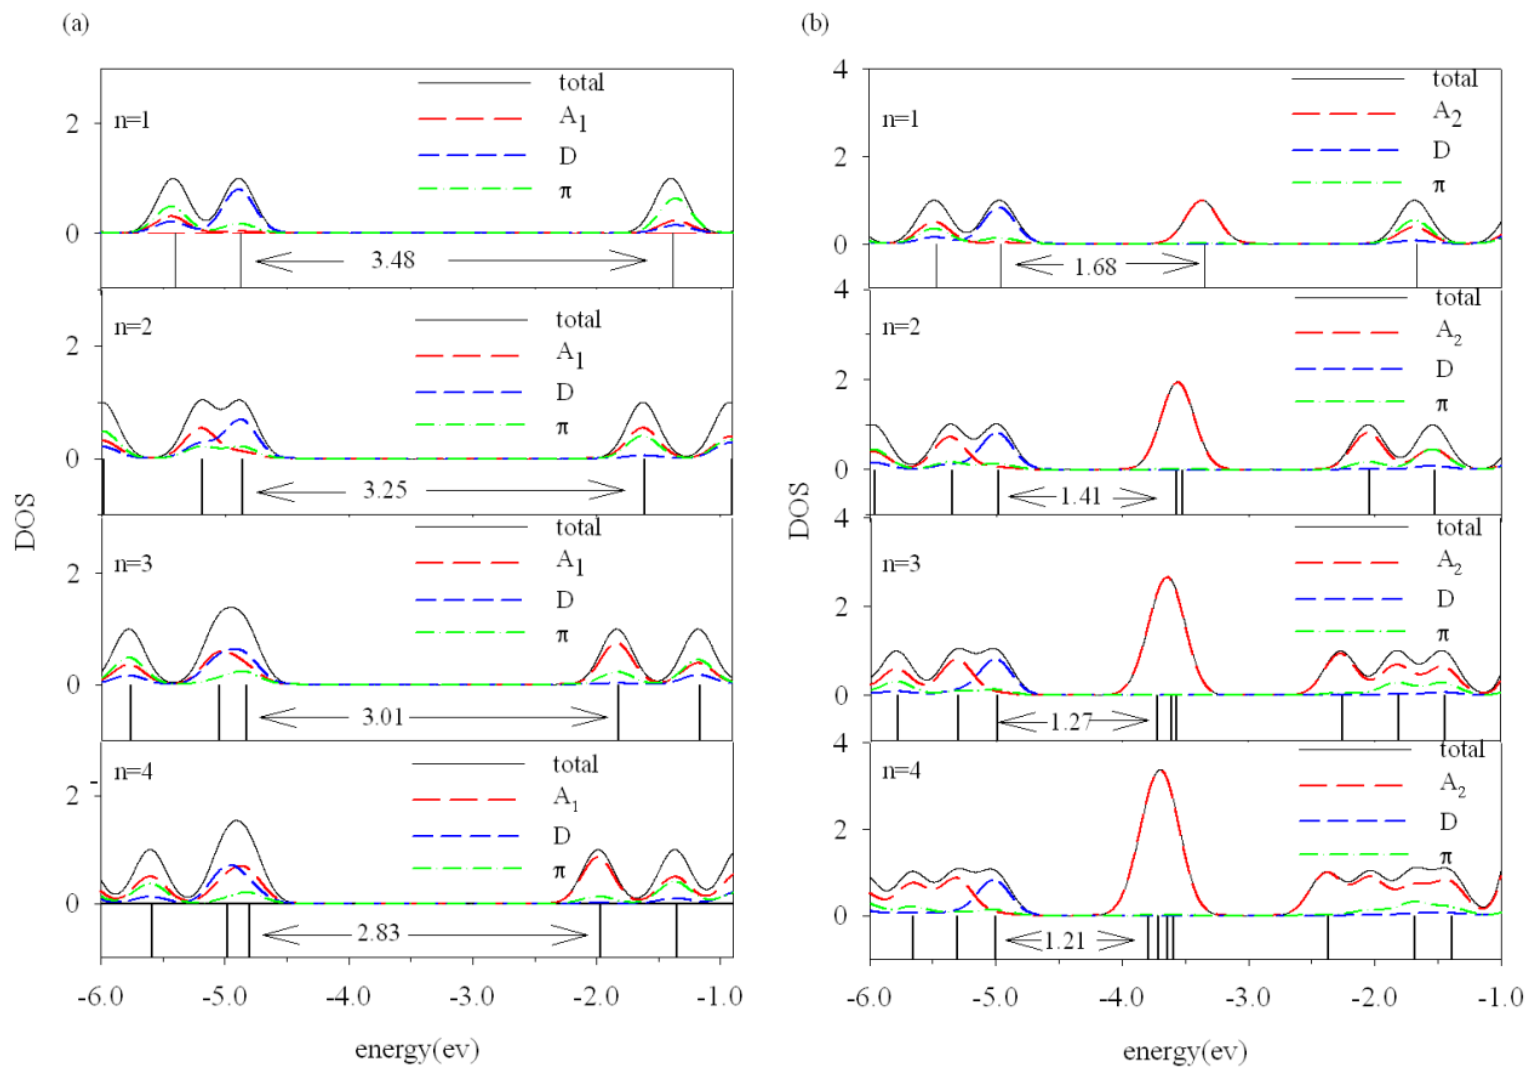

**Figure 7S.** The total density of states of (a)  $D-\pi-[A_1]_n$  (b)  $D-\pi-[A_2]_n$  sensitizers

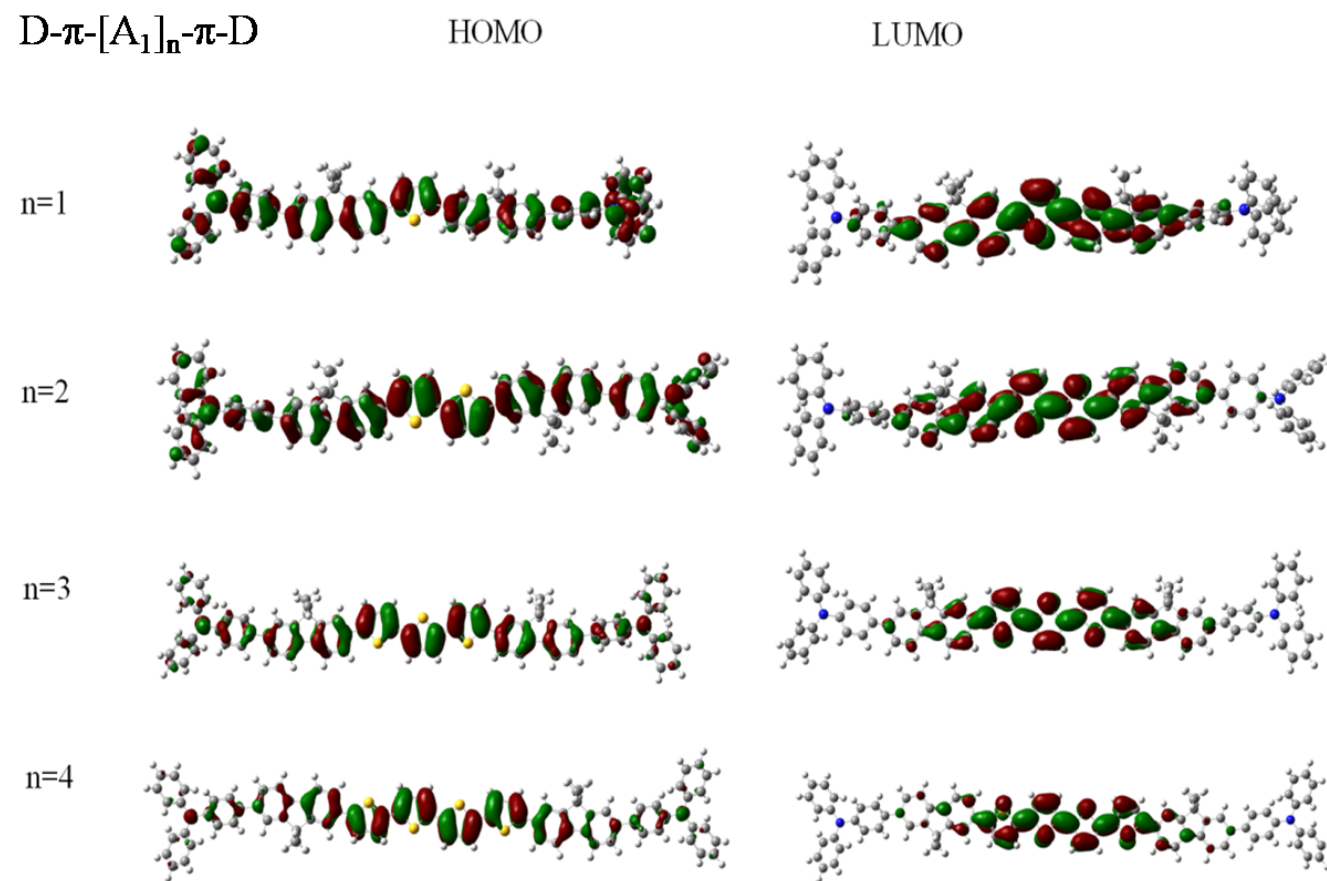

**Figure 8S.** Selected isodensity plots of the frontier MOs for D- $\pi$ -[A<sub>1</sub>]<sub>n</sub>- $\pi$ -D series sensitizers

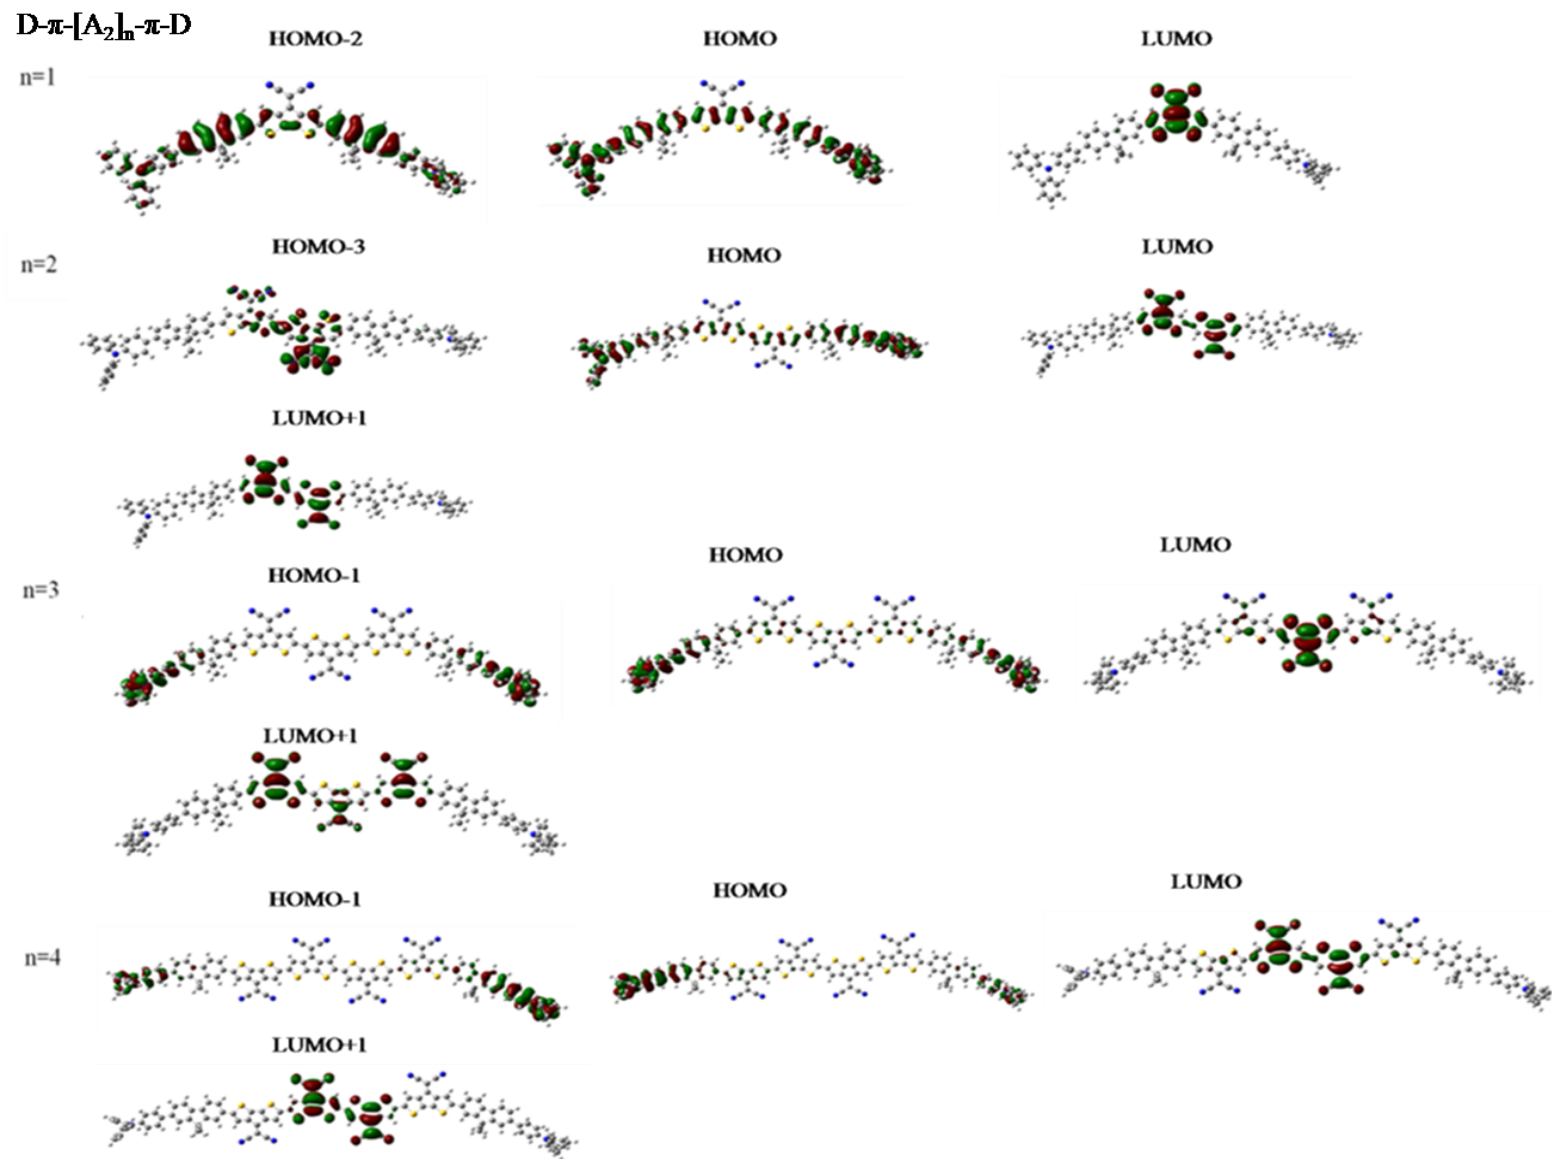

**Figure 9S.** Selected isodensity plots of the frontier MOs for  $D-\pi-[A_2]_n-\pi-D$  series sensitizers

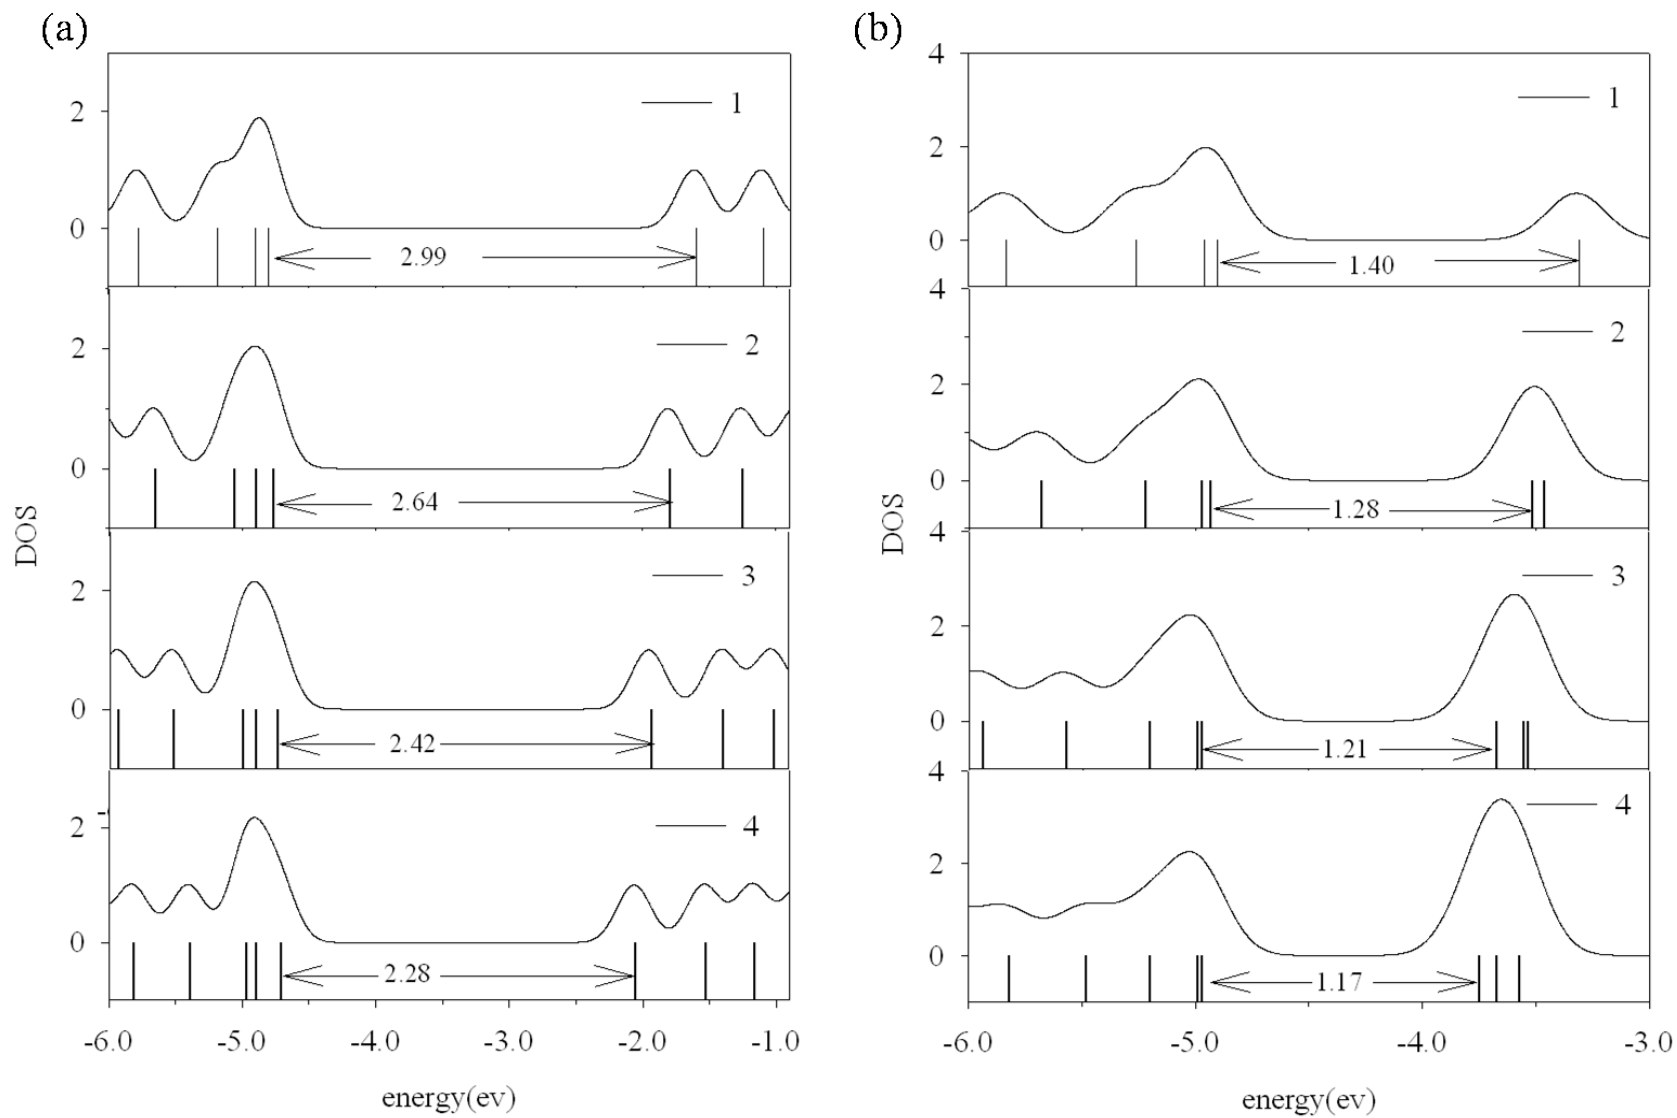

**Figure 10S.** The total density of states of (a) D- $\pi$ -[A<sub>1</sub>]<sub>n</sub>- $\pi$ -D (b) D- $\pi$ -[A<sub>2</sub>]<sub>n</sub>- $\pi$ -D sensitizers

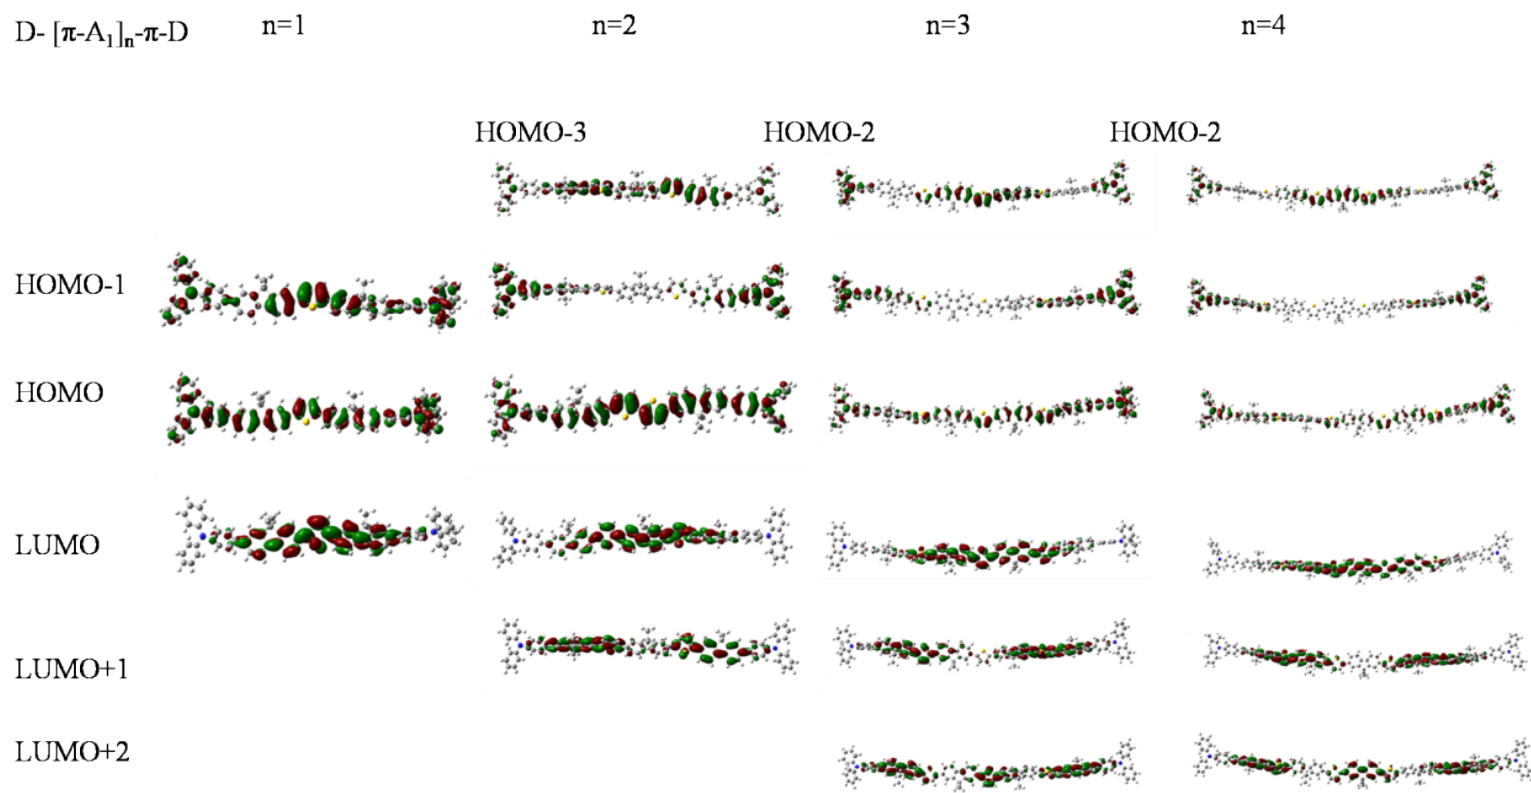

**Figure 11S.** Selected isodensity plots of the frontier MOs for D-  $[\pi-A_1]_n$ - $\pi$ -D series sensitizers

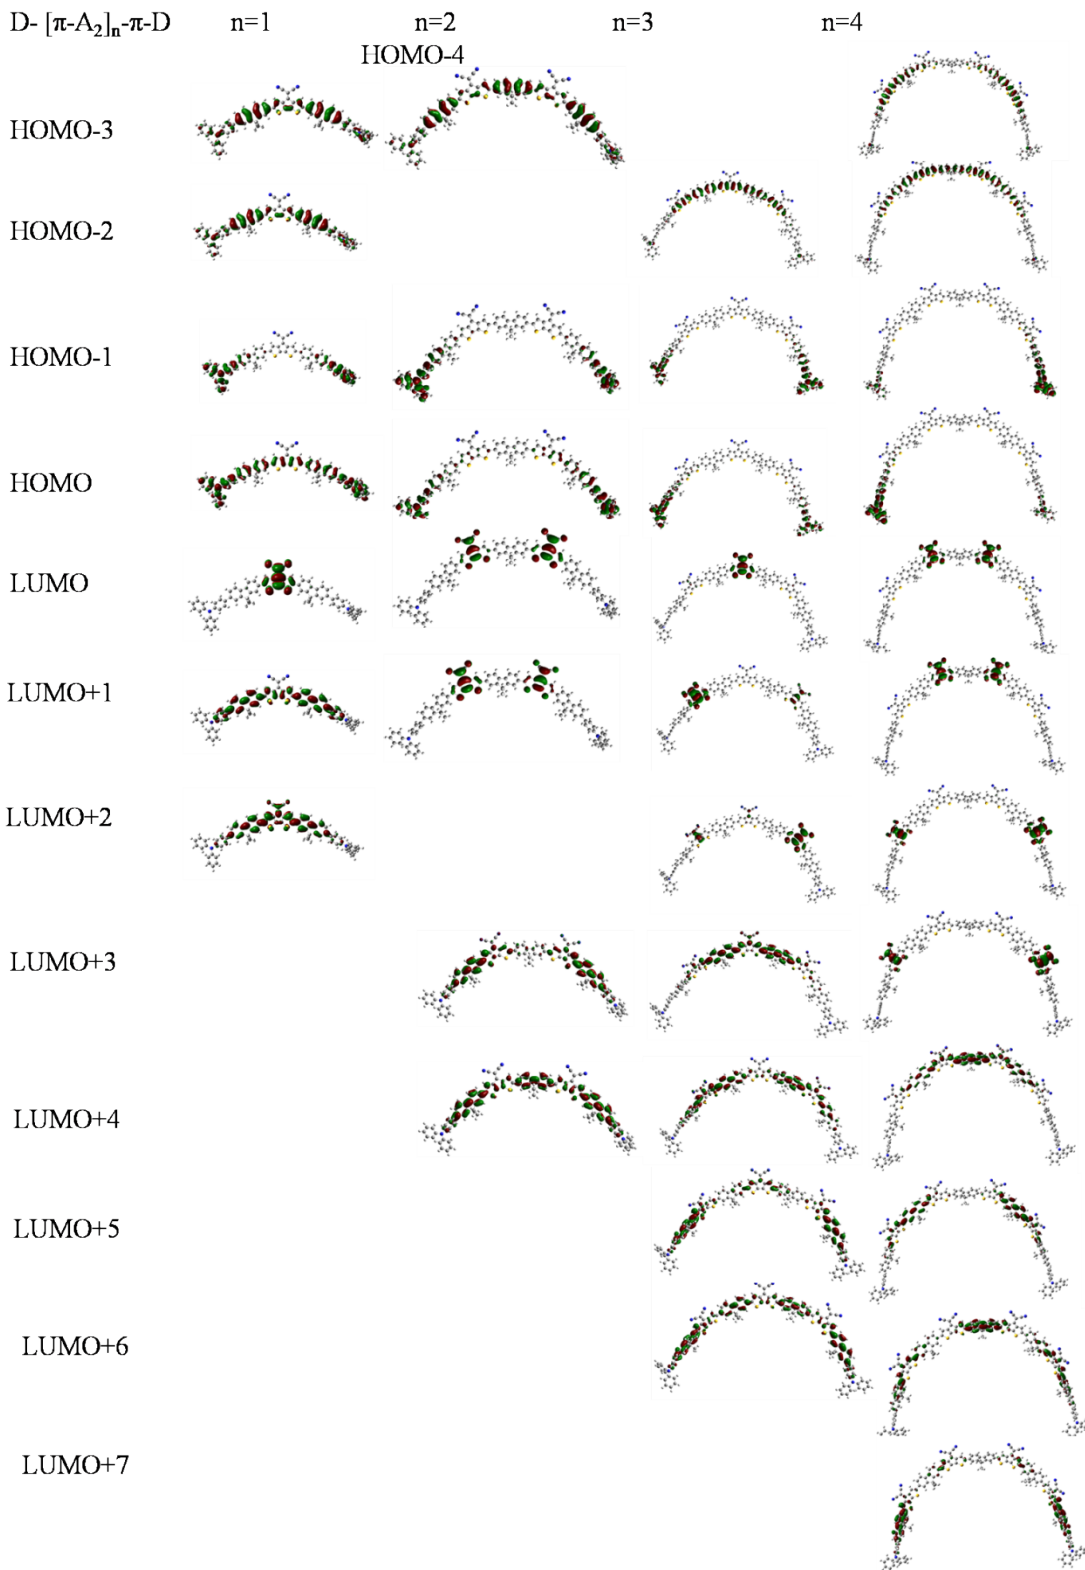

**Figure 12S.** Selected isodensity plots of the frontier MOs for D-  $[\pi-A_2]_n$ - $\pi$ -D series sensitizers
